# Supplementary material for: Impact of tumor programmed death ligand-1 expression on osimertinib efficacy in untreated EGFR-mutated advanced non-small cell lung cancer: a prospective observational study
Source: PubMed Central journal article supplement — Transl Lung Cancer Res. 2021 Aug;10(8):3582–93. doi: 10.21037/tlcr-21-461 (PMC8435385; doi:10.21037/tlcr-21-461), 2021-08
Supplement: tlcr-10-08-3582-supplementary.pdf [file tlcr-10-08-3582-supplementary.pdf]

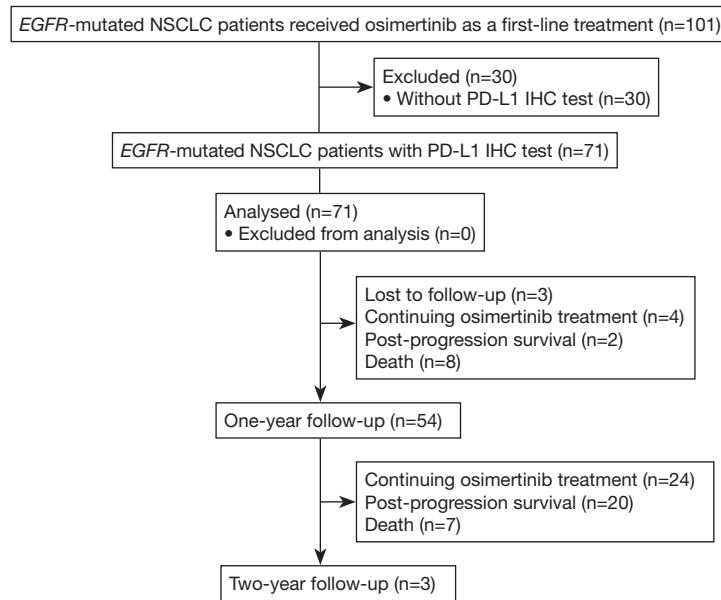

Figure S1 Flow diagram on this prospective study.

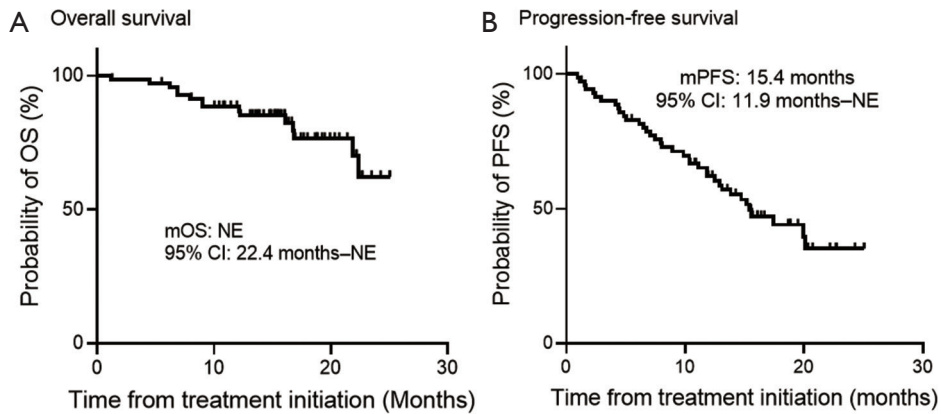

Figure S2 Kaplan-Meier curves for OS and PFS of EGFR mutated non-small cell lung cancer patients who received osimertinib monotherapy. (A) OS in all patients (n=71); (B) PFS in all patients (n=71). OS, overall survival; PFS, progression-free survival; EGFR, epidermal growth factor receptor; CI, confidence interval; NE, not evaluable.

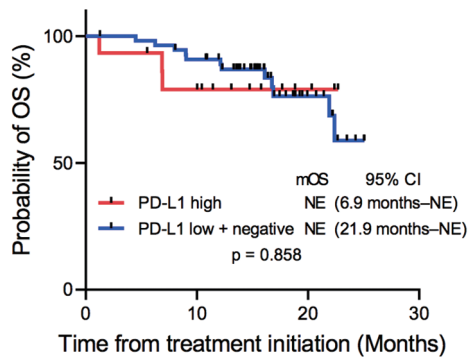

**Figure S3** Kaplan-Meier curves for OS of *EGFR*-mutated non-small cell lung cancer patients who received osimertinib monotherapy between tumor PD-L1 high group and tumor PD-L1 low plus negative group. OS, overall survival; *EGFR*, epidermal growth factor receptor; PD-L1, programmed death-ligand 1; CI, confidence interval; NE, not evaluable.

**Table S1** Response to osimertinib for patients with untreated advanced *EGFR*-mutated non-small cell lung cancer

| Characteristics | n=71               |
|-----------------|--------------------|
| CR              | 2 (2.8)            |
| PR              | 47 (66.2)          |
| SD              | 14 (19.7)          |
| PD              | 5 (7.0)            |
| NE              | 3 (4.2)            |
| ORR (95% CI)    | 72.1% (59.9–82.3%) |
| DCR (95% CI)    | 92.6% (83.7–97.6%) |

CR, complete response; PR, partial response; SD, stable disease; PD, progressive disease; NE, not evaluable; ORR, objective response rate; CI, confidence interval; DCR, disease control rate.

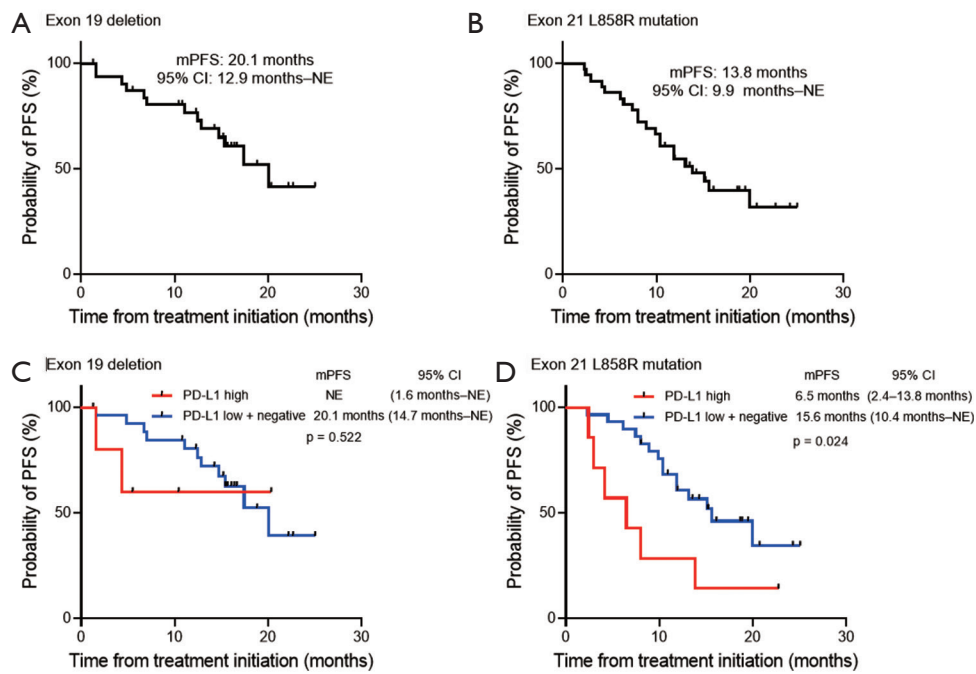

**Figure S4** Kaplan-Meier curves for PFS of *EGFR*-mutated non-small cell lung cancer patients who received osimertinib monotherapy. (A) PFS in patients harboring exon 19 deletion (n=32); (B) PFS in patients harboring exon 21 L858R mutation (n=36); (C) comparison of PFS between tumor PD-L1 high group and tumor PD-L1 low plus negative group in patients harboring exon 19 deletion; (D) comparison of PFS between tumor PD-L1 high group and tumor PD-L1 low plus negative group in patients harboring exon 21 L858R mutation. PFS, progression-free survival; *EGFR*, epidermal growth factor receptor; PD-L1, programmed death-ligand 1; CI, confidence interval; NE, not evaluable.
